# Supplementary material for: The ubiquitin ligase RFWD3 is required for translesion DNA synthesis
Source: PubMed Central journal article supplement — Mol Cell. 2021 Feb 4;81(3):442–458.e9. doi: 10.1016/j.molcel.2020.11.029 (PMC7864614; doi:10.1016/j.molcel.2020.11.029), 2021-02-04

**Supplemental Information**

**The ubiquitin ligase RFWD3 is required  
for translesion DNA synthesis**

**Irene Gallina, Ivo A. Hendriks, Saskia Hoffmann, Nicolai B. Larsen, Joachim Johansen, Camilla S. Colding-Christensen, Lisa Schubert, Selene Sellés-Baiget, Zita Fábíán, Ulrike Kühbacher, Alan O. Gao, Markus Räschle, Simon Rasmussen, Michael L. Nielsen, Niels Mailand, and Julien P. Duxin**

## Supplemental Figure Legends

**Figure S1. RFWD3 is essential for TLS across peptide adducts. Related to Figure 1.** (A) Left panel, schematic of *Xenopus laevis* RFWD3 protein indicating the residues used to generate RFWD3-N and RFWD3-F antibodies. Right panel, mock- and RFWD3-N or RFWD3-F depleted extracts were blotted with the indicated antibodies. Asterisk indicates a non-specific band. (B) pMH was replicated in mock- or RFWD3-F depleted extracts. Samples were digested and analyzed as in Figure 1E. (C) Whole proteome MS analysis of mock- versus RFWD3-depleted egg extracts. The volcano plot shows the difference in abundance of proteins between the mock reaction and RFWD3-depleted samples (with either N or F antibodies) (x-axis), plotted against the  $p$ -value resulting from two-tailed Student's  $t$ -testing (y-axis). Proteins significantly down-regulated (FDR<5%) in RFWD3-depleted extracts are represented in red.  $n=4$  biochemical replicates, FDR<5% corresponds to a permutation-based FDR-adjusted  $q$ -value of <0.05. (D) Extracts depleted with either RFWD3-N or RFWD3-F were compared to a mock depletion dilution series and blotted with the indicated antibodies. Note that none of the blotted proteins appear as significantly depleted. (E) A plasmid containing a site-specific Fpg crosslink (depicted in the left scheme) was replicated in mock- or RFWD3-depleted extracts and analyzed as in Figure 1C (top panel) or digested and analyzed as in Figure 1E alongside a sequencing ladder (lower panels). Red arrowheads indicate the accumulation of open circular molecules observed in the absence of RFWD3. (F) pMH<sup>ssDNA</sup> or pMH<sup>ssDNA-PK</sup> were incubated in mock- or RFWD3-depleted non-licensing extracts in the presence of [ $\alpha$ -<sup>32</sup>P]dATP. Samples were digested with PvuII and NdeI and analyzed on a denaturing polyacrylamide gel. The upper scheme depicts the extension products generated by PvuII and NdeI digest.

**Figure S2. Replication of pFPG requires TLS. Related to Figure 2.** (A) Mock-, Pol $\eta$ -, REV1- or Pol $\eta$  and REV1-depleted extracts were blotted with the indicated antibodies. (B) pMH was replicated in Pol $\eta$ -depleted extracts supplemented with buffer or recombinant Pol $\eta$ . Samples were digested and analyzed as in Figure 1E. (C) pMH<sup>ssDNA</sup> was incubated in mock-, Pol $\eta$ - or REV1-depleted non-licensing extracts. Samples were digested and analyzed as in Figure S1E. (D) Scheme comparing the different crosslinking chemistries between M.HpaII and Fpg. (E) pFpg was replicated in mock-, Pol $\eta$ - or REV1-depleted extracts and analyzed as in Figure 1C. (F) Samples from (E) were digested and analyzed as in Figure 1E. Note that the different requirements of TLS polymerases to bypass Fpg and M.HpaII adducts are likely dictated by their different crosslinking chemistry. (G) Quantification of mutation frequencies measured after replication of pFpg in mock- or Pol $\eta$ -depleted

egg extracts. Replication samples were amplified by PCR and analyzed by next generation sequencing (see Materials and Methods). The 0 position corresponds to the location of the protein adduct, which is linked to an abasic site. Note that the mutation frequencies across the Fpg crosslink are 10 times higher than for HpaII crosslink. This is because Fpg is crosslinked to an abasic site, which carries no base information. **(H)** Distribution of nucleotide misincorporation from the data generated in (G). Misincorporation is based on the assumption that a G was originally paired to C. In cells, G can be oxidized to 8-oxoguanine and converted to an abasic site via Ogg1 or Fpg. During this process, the glycosylase can become irreversibly crosslinked to the open ring abasic site intermediate.

**Figure S3, RFWD3 is essential for TLS during pICL repair. Related to Figure 3.** **(A)** Simplified model of pICL<sup>Pt</sup> repair in egg extracts. **(B)** pICL<sup>Pt</sup> was replicated in mock-, REV1- or RFWD3-depleted extracts and reaction samples were blotted with the indicated antibodies. The % of ubiquitylated FANCD2 in each lane was calculated as the fraction of the intensities of the ubiquitylated band divided by the sum of the ubiquitylated and non-ubiquitylated bands. **(C)** Scheme depicting the products generated upon HincII and SapI digest in the pICL repair assay. **(D-E)** pICL<sup>Pt</sup> was replicated in mock- or RFWD3-depleted extracts (with either RFWD3-N or RFWD3-F). Samples were isolated and digested with either HincII alone (D) or with HincII and SapI (E), and analyzed by agarose gel electrophoresis. pQuant is used as a recovery control. The percentage of repair of the ICL was quantified and plotted in the lower graph.

**Figure S4. RFWD3 regulates PCNA ubiquitylation. Related to Figure 4.** **(A)** pICL<sup>Pt</sup> was replicated in mock- or RFWD3-depleted extracts and the reaction samples were blotted against the indicated antibodies. Note that ubiquitylation of FANCD2 and phosphorylation of CHK1 occur with normal kinetics in the absence of RFWD3. **(B)** pMH<sup>PK</sup> and pICL<sup>Pt</sup> were replicated in the presence or absence of a p97 inhibitor (NMS873) and analyzed as in Figure 1C. Note that upon p97 inhibition, CMG unloading is severely inhibited during replication-coupled repair of pICL<sup>Pt</sup> and replication intermediates are stabilized (Fullbright et al., 2016). **(C)** pMH<sup>PK</sup> samples from (B) were digested and analyzed as in Figure 1E. **(D)** pMH<sup>ssDNA</sup>, which triggers the damage-dependent destruction of CDT1, was incubated in non-licensing extracts in the presence or absence of ubiquitin E1 inhibitor (MLN7243), and total extracts were blotted with the indicated antibodies at the indicated time point. PSA3 was used as loading control. Note that MLN7243 inhibits the ubiquitin dependent destruction of CDT1. **(E)** pMH or pMH<sup>PK</sup> were replicated in egg extracts in the presence or absence of ubiquitin E1 inhibitor (MLN7243) to block *de novo* ubiquitylation. Samples were analyzed by agarose gel

electrophoresis as in Figure 1C. Red arrows indicate persisting OC molecules. (F) pMH was replicated in extracts in the presence of 1 mg/mL of the indicated ubiquitin mutant. Radiolabeled samples were digested and analyzed as in Figure 1E. (G) Mock- or UBC13-depleted extracts were blotted with the indicated antibody. Asterisk indicates an unspecific band. (H-I) pMH was replicated in Mock- or UBC13-depleted extracts in the presence of radiolabeled [ $\alpha$ - $^{32}$ P]dATP and reaction products were resolved on an agarose gel (H) or digested and resolved on a denaturing polyacrylamide gel (I). Red arrowheads indicate persistent OC molecules in the UBC13-depleted reaction. (J) Sperm chromatin was either untreated or treated with 2000 J/m<sup>2</sup> of UV-C and then incubated in non-licensing mock-, UBC13- or RFWD3-depleted extracts for 30 min. Chromatin was recovered via chromatin spindown and samples were blotted with the indicated antibodies. Note that UBC13 depletion specifically abrogates PCNA poly-ubiquitylation. (K) Sperm chromatin was either untreated or treated with 2000 J/m<sup>2</sup> of UV-C and then incubated in non-licensing extracts in the presence of ubiquitin E1 inhibitor (MLN7243) or 1 mg/mL of the indicated ubiquitin mutants. Samples were blotted with the indicated antibodies. Red dots indicate PCNA ubiquitylated species, black dot indicates SUMOylated PCNA. (L) Sperm chromatin was either untreated or treated with 20 J/m<sup>2</sup> of UV-C and then replicated in mock- or RFWD3-depleted extracts. Branched and branch-free DNA molecules are indicated according to (Hashimoto et al., 2010). (M) pCTRL was replicated in either mock or RFWD3-depleted extracts. Reactions were subjected to plasmid pull-down and samples were blotted with the indicated antibodies. Red dots correspond to PCNA ubiquitylation. Black dot corresponds to mono-SUMOylated PCNA. (N) pMH<sup>Leads</sup> was replicated in mock- or RFWD3-depleted extracts. Radiolabeled samples were analyzed as in Figure 1C. Red arrowheads indicate persistent OC molecules.

**Figure S5. Contribution of E3 ubiquitin ligases to PCNA ubiquitylation in human cells. Related to Figure 5.** (A) UO2S cells expressing Strep-HA-PCNA transfected with the indicated siRNAs were treated with UV light and PCNA was recovered via pull-down under denaturing conditions as in Figure 5A. (B) U2OS or U2OS cells expressing Strep-HA-PCNA were transfected with RFWD3 and the indicated siRNAs. Proteins were recovered and analyzed as in Figure 5A.

**Figure S6. RFWD3 does not regulate SUMO levels on UV damaged chromatin. Related to Figure 6.** (A) MS analysis of protein recruitment to UV-treated sperm chromatin compared to untreated sperm chromatin in egg extracts. The volcano plot shows the difference in abundance of proteins between the two sample conditions (x-axis), plotted against the *p*-value resulting from two-tailed Student's *t*-testing (y-axis). Proteins significantly down- or up-regulated (FDR<5%) upon UV

treatment are represented in red or blue, respectively.  $n=4$  biochemical replicates,  $FDR<5\%$  corresponds to a permutation-based FDR adjusted  $q$ -value of  $<0.05$ . Note that different isoforms of the same protein can sometimes be detected. Proteins in dark blue or red were also significantly affected by depletion of RFWD3 (shown in Figure 6B). **(B)** Mock-, REV1- or RFWD3-depleted extracts were blotted with the indicated antibodies. Note that depletion of REV1 leads to substantial co-depletion of REV7 but not Pol $\kappa$ . **(C)** Quantification of SUMO1, SUMO2 and SUMO3 on sperm chromatin, directly identified by MS/MS, and quantified in a label-free manner. Control, mock-depleted extracts incubated with undamaged chromatin; UV, mock-depleted extracts incubated with UV-treated chromatin; RFWD3 $\Delta$ -UV, RFWD3-depleted extracts incubated with UV-treated chromatin; REV1 $\Delta$ -UV, REV1-depleted extracts incubated with UV-treated chromatin.  $n=4$  biochemical replicates, error bars represent SEM. \*  $p<0.05$ , via two-tailed Student's  $t$ -testing.

**Figure S7. RFWD3 ubiquitylates proteins on ssDNA. Related to Figure 7.** **(A)** pFpg or pFpg<sup>ssDNA</sup> were incubated in non-licensing extracts depleted of SPRTN and plasmid pull-down was performed at the indicated time points. Samples were blotted with the indicated antibodies. **(B)** pFpg<sup>ssDNA</sup> was incubated in non-licensing SPRTN-depleted extracts and DPC pull-down was performed at the indicated time points as in Figure 7A. At each time point the pull-down samples were split and either untreated or treated with the indicated specific deubiquitylating enzymes (Boston Biochem) before western blot analysis. Otubain1, cleaves lysine K48-linked ubiquitin chains, while AMSH cleaves lysine K63-linked ubiquitin chains. **(C)** pMH<sup>ssDNA</sup> was incubated in mock- or RFWD3-depleted non-licensing extracts (also depleted of SPRTN) and reaction samples processed as in Figure 7A. **(D-E)** Cross-complementation of RFWD3 depletion (RFWD3-F antibody) with RFWD3 protein eluted from immunoprecipitated egg extracts using RFWD3-N antibody. **(D)** schematic of the experimental setup and western blot showing the level of RFWD3 in the extract in the different indicated conditions. **(E)** pFpg<sup>ssDNA</sup> was incubated in mock- or RFWD3-depleted (RFWD3-F antibody) non-licensing extract and supplemented with peptide eluates of IgG- or RFWD3-immunoprecipitated egg extracts. Reaction samples were processed as in (A). Asterisk denotes non-specific bands.

Figure S1

A.

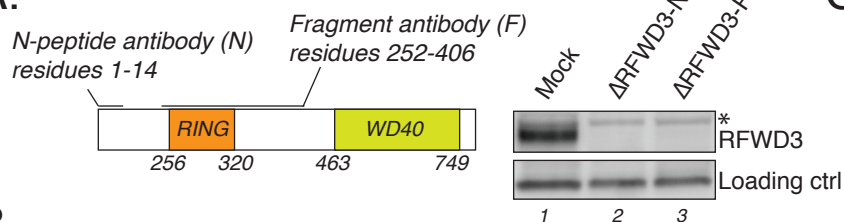

B.

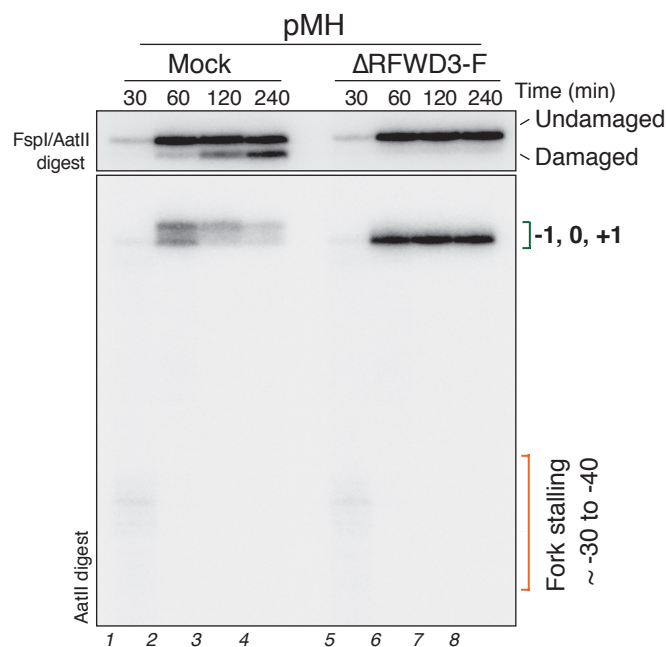

C.

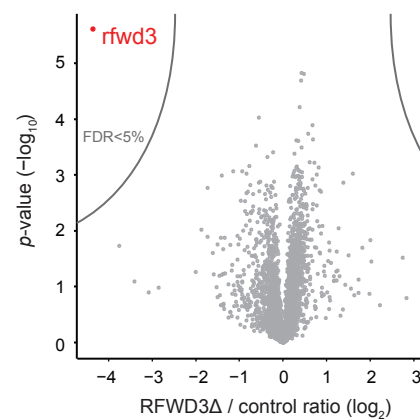

D.

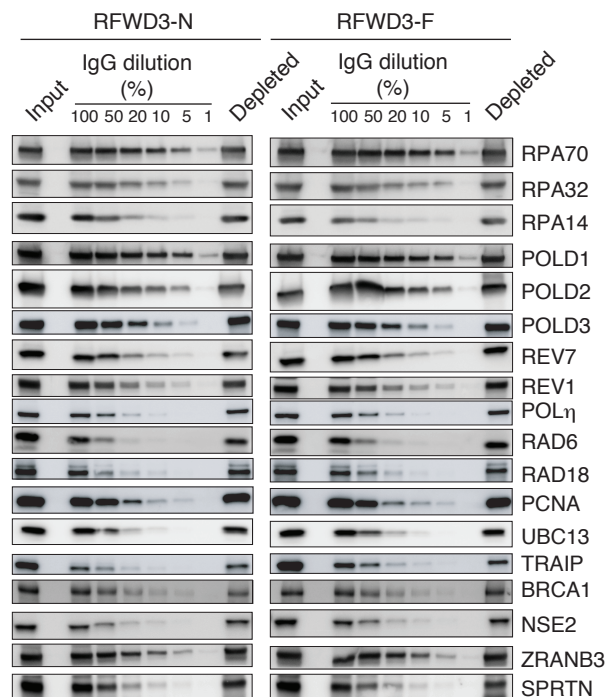

E.

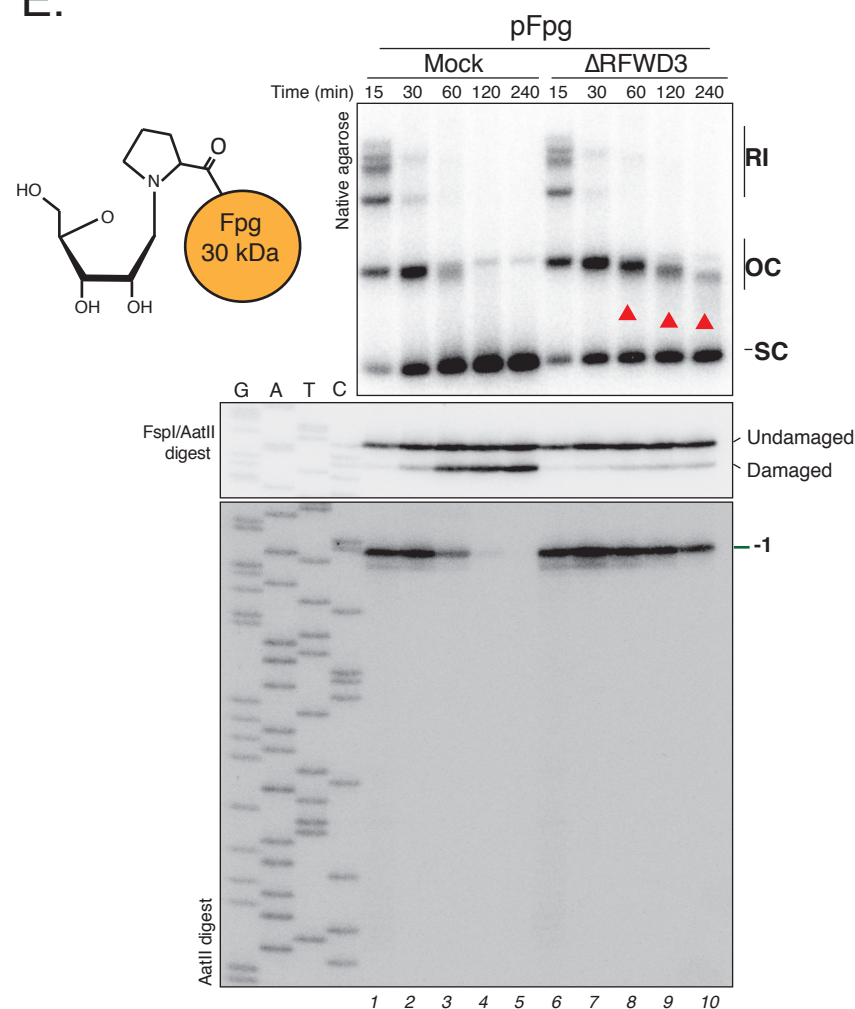

F.

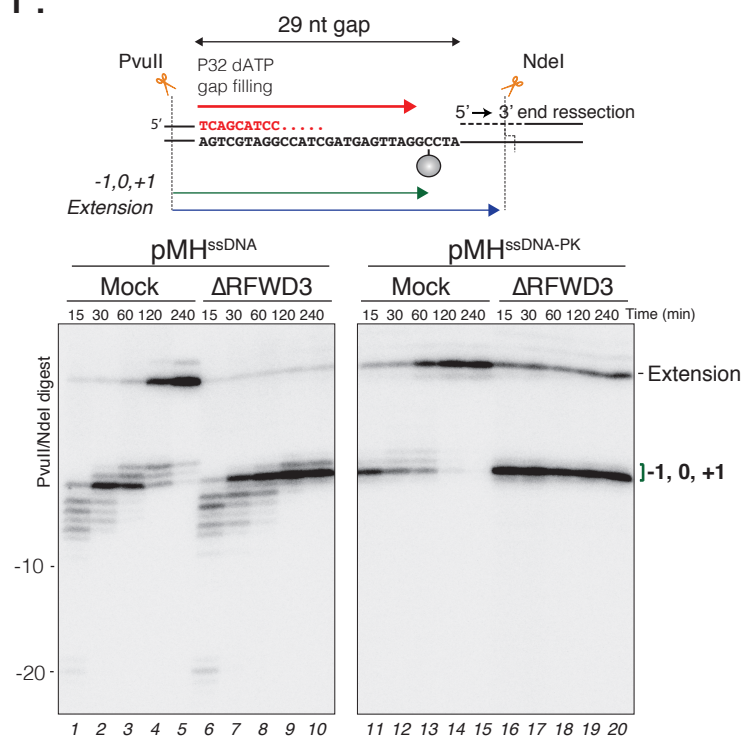

Figure S2

A.

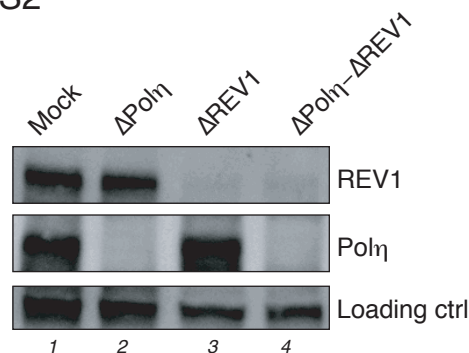

B.

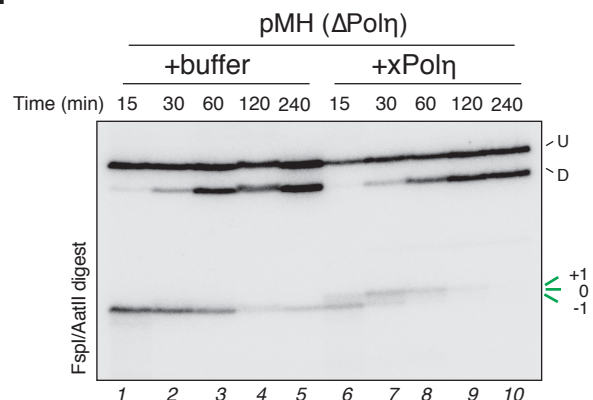

C.

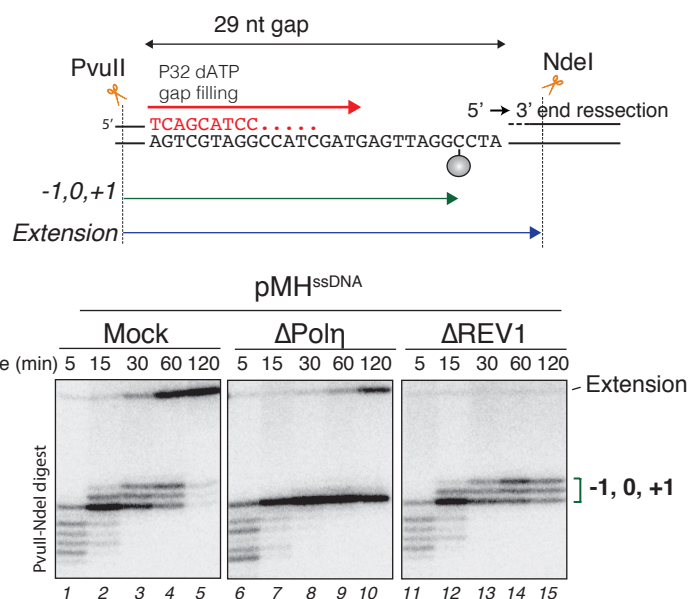

D.

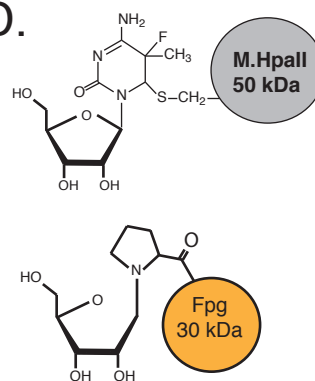

E.

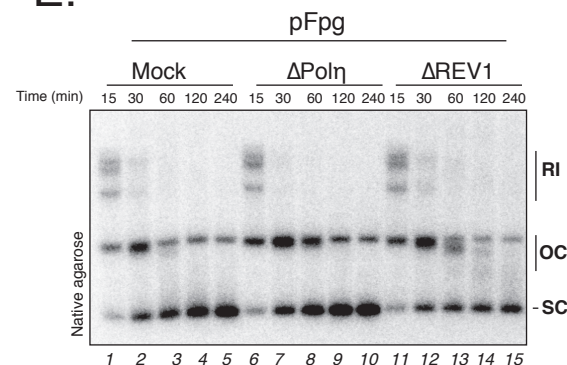

F.

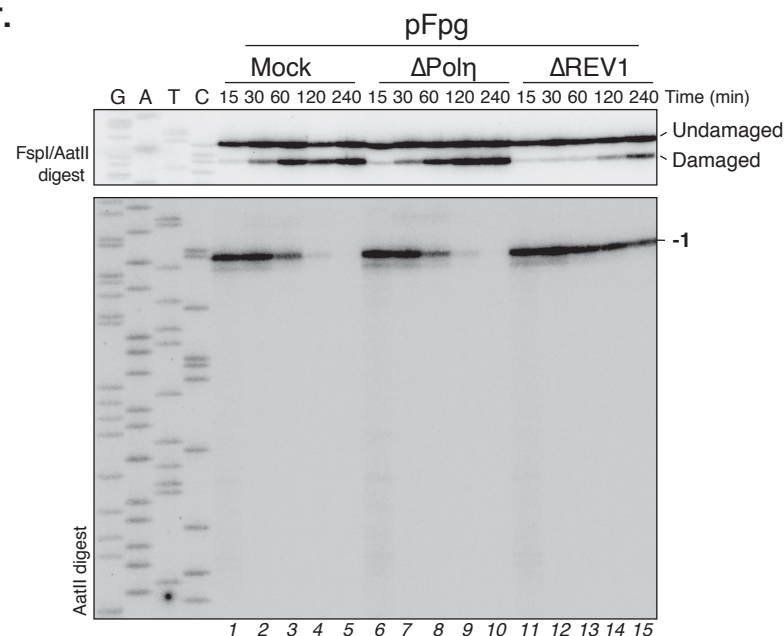

G.

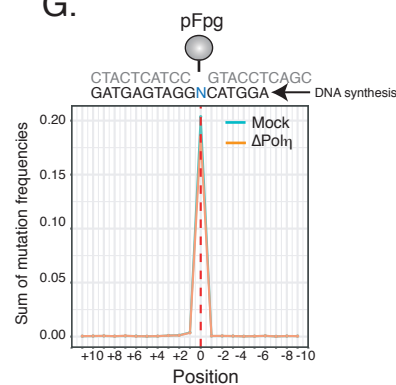

H.

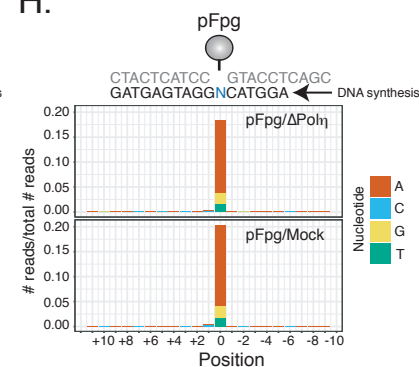

Figure S3

A.

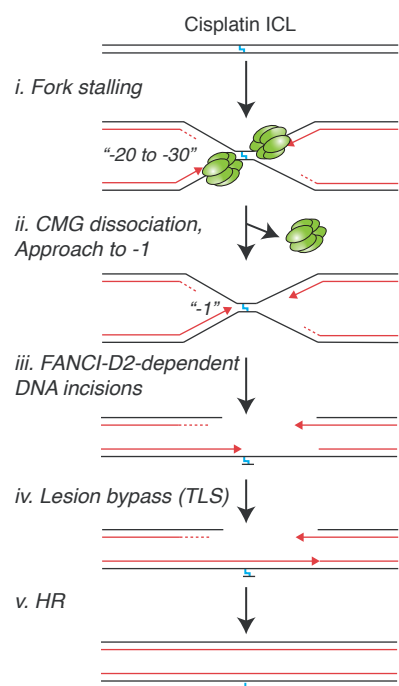

B.

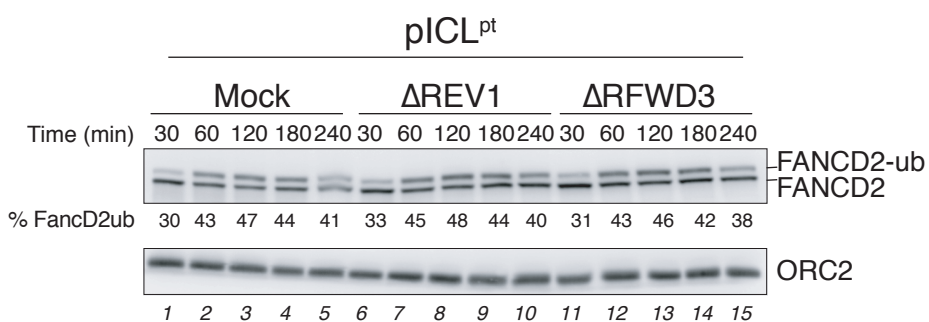

C.

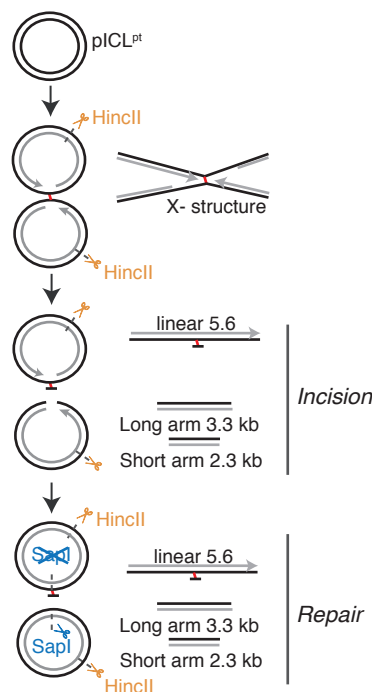

D.

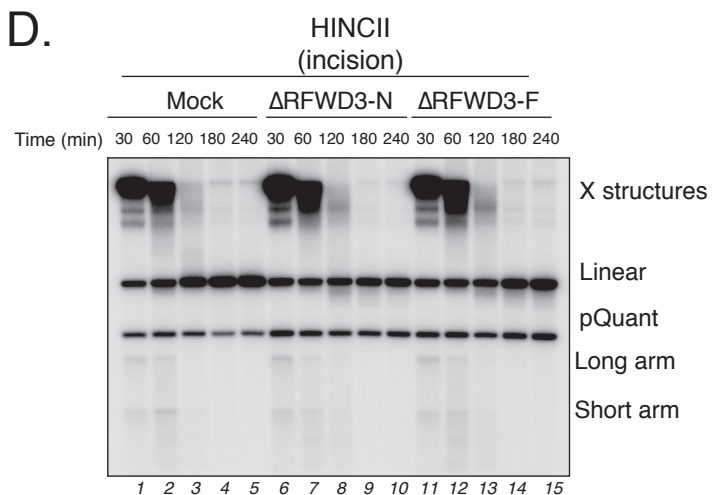

E.

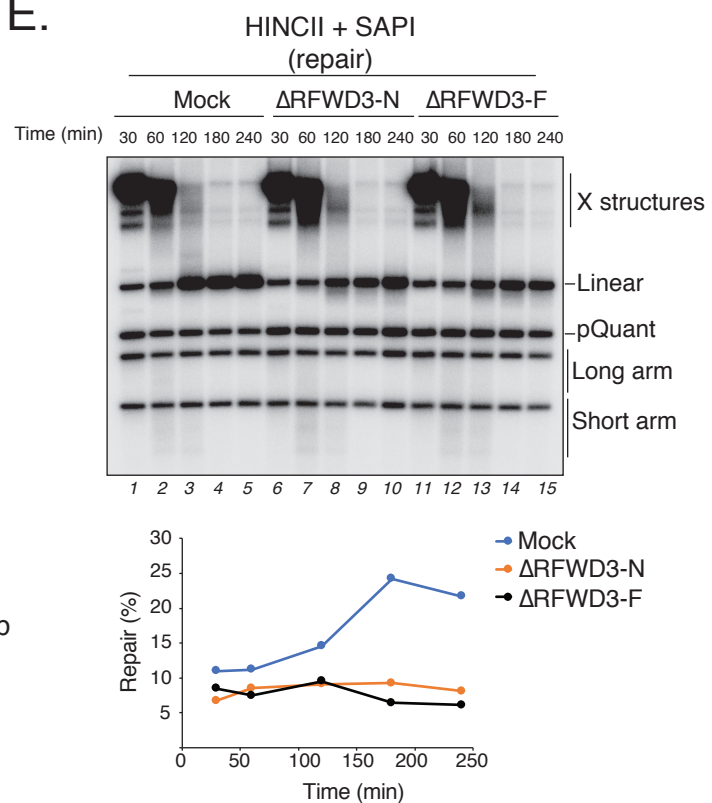

Figure S4

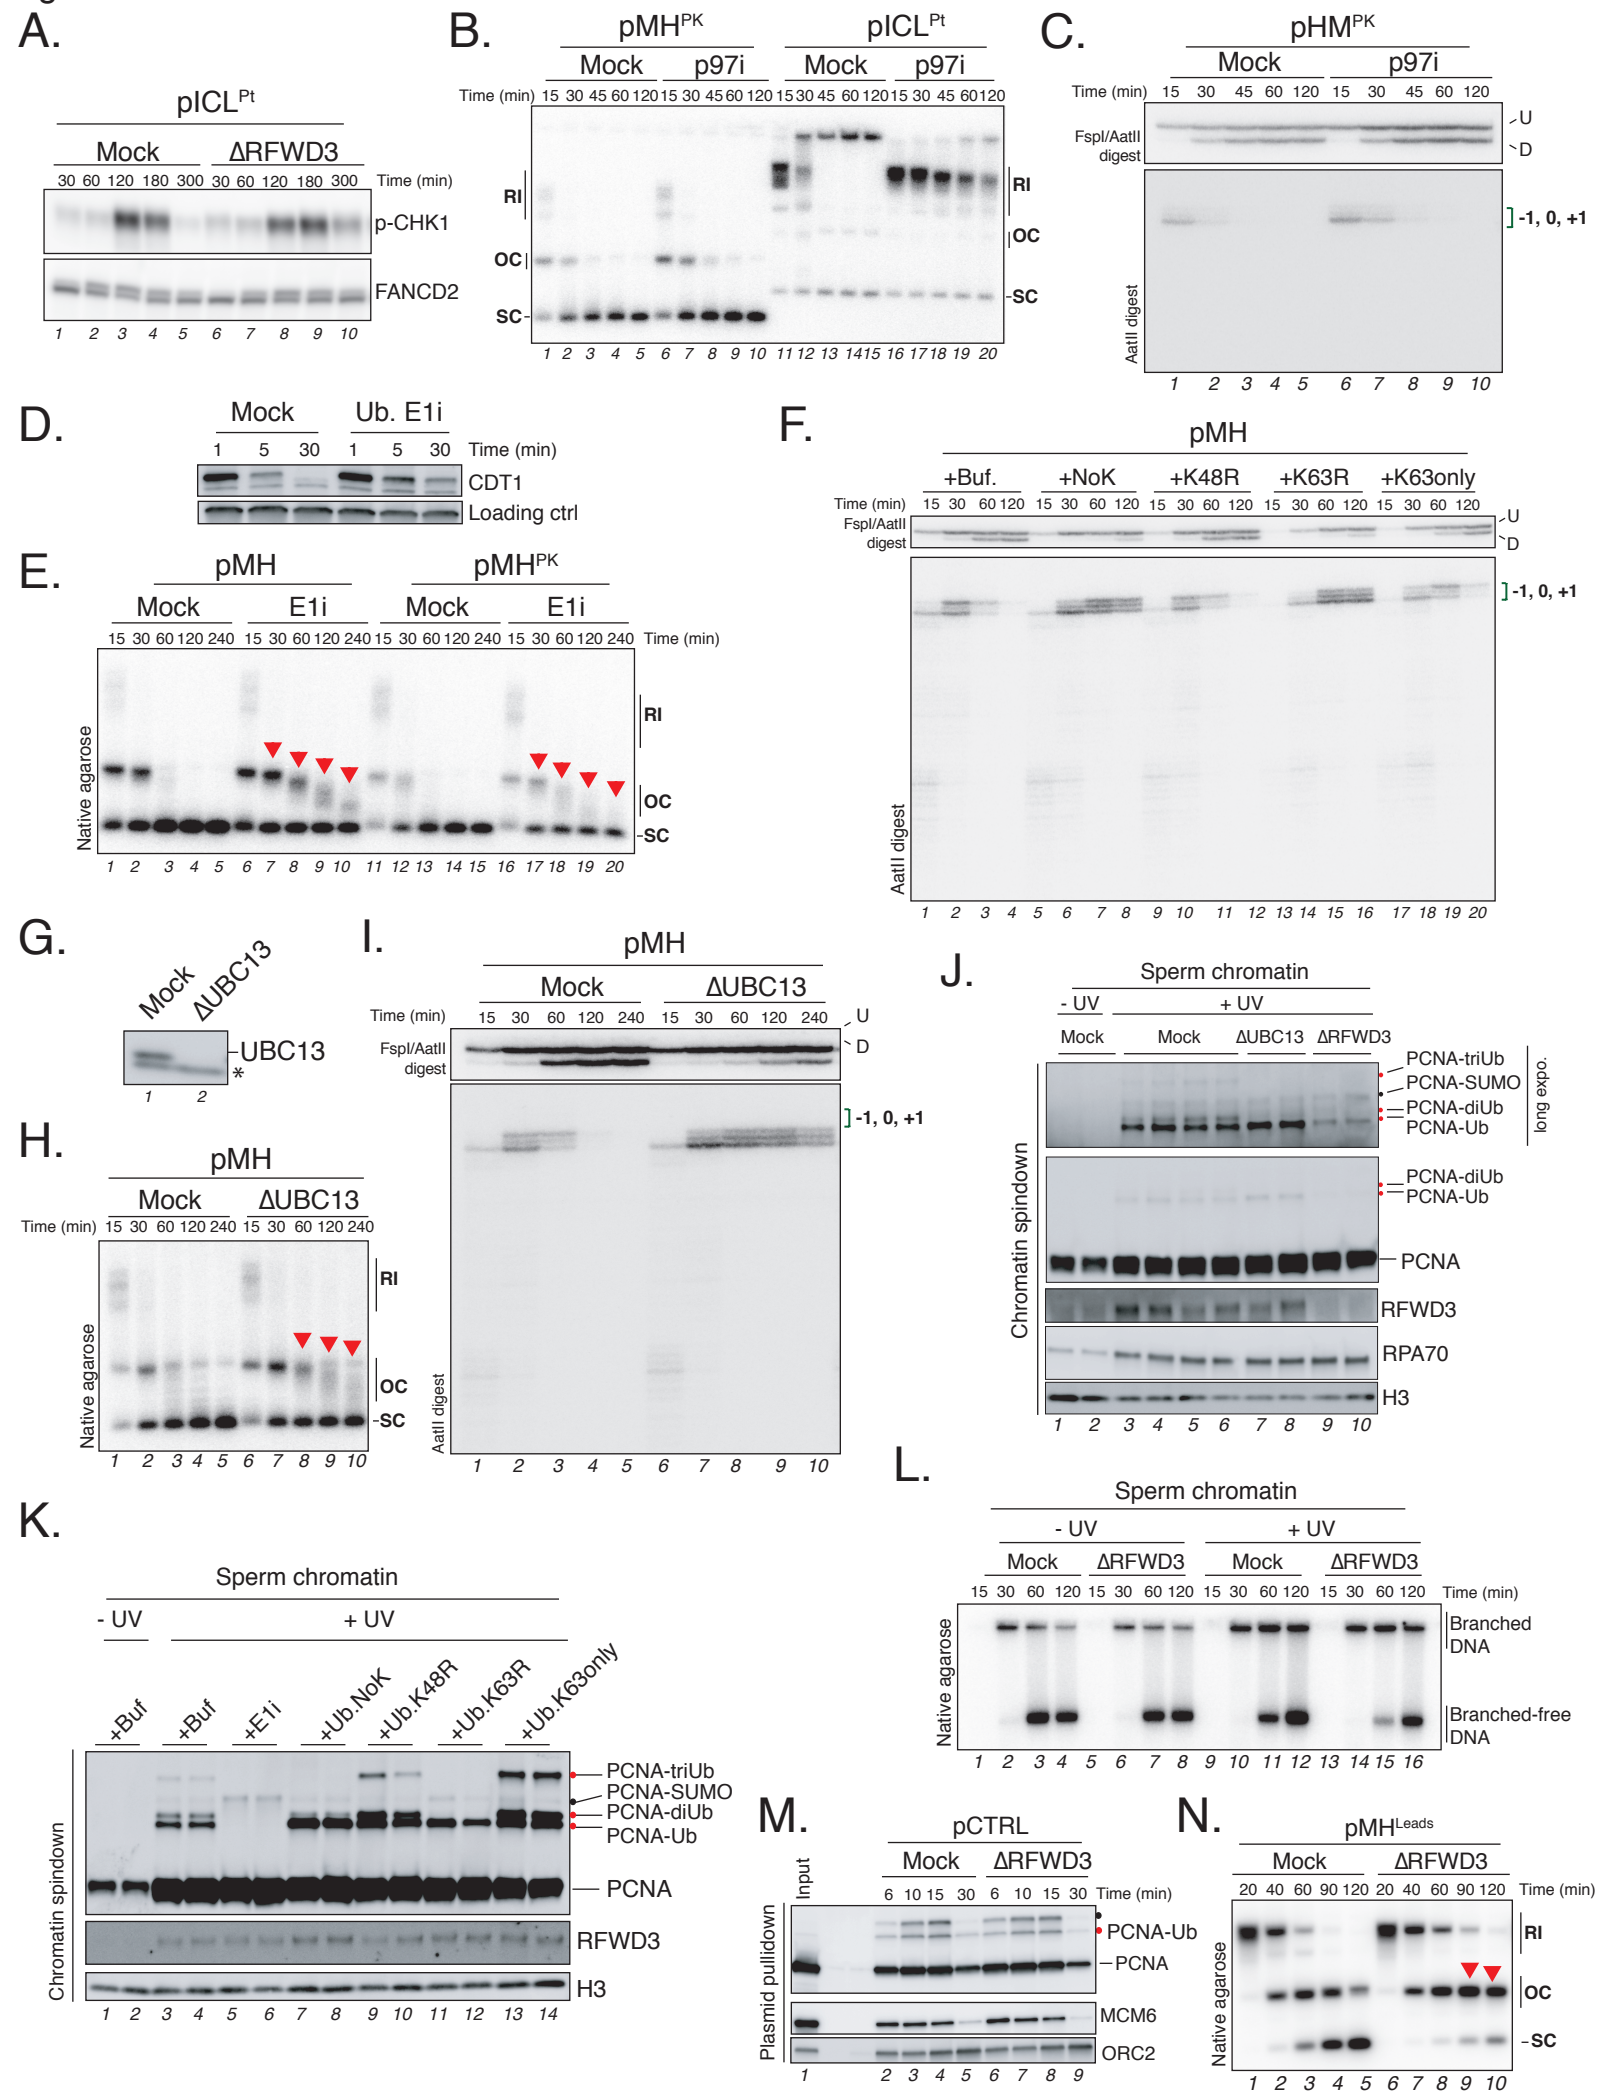

Figure S5

A.

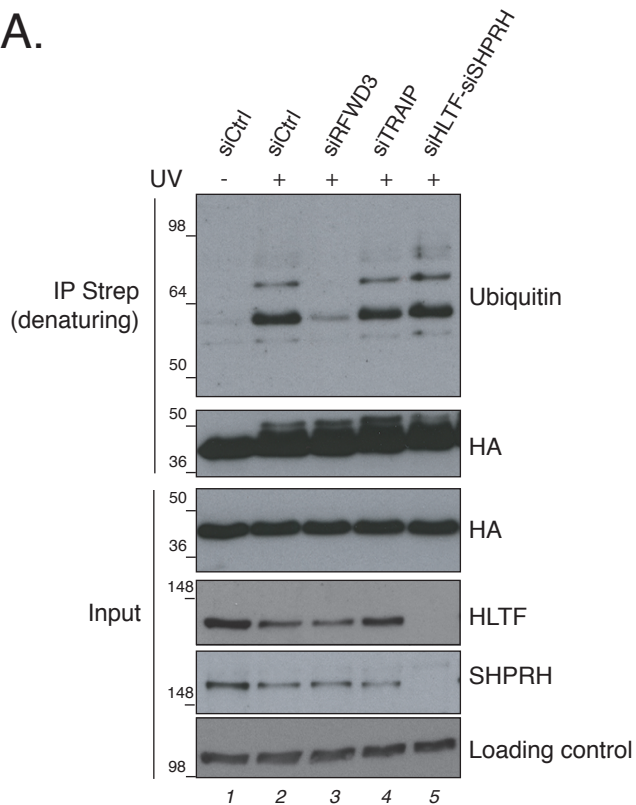

B.

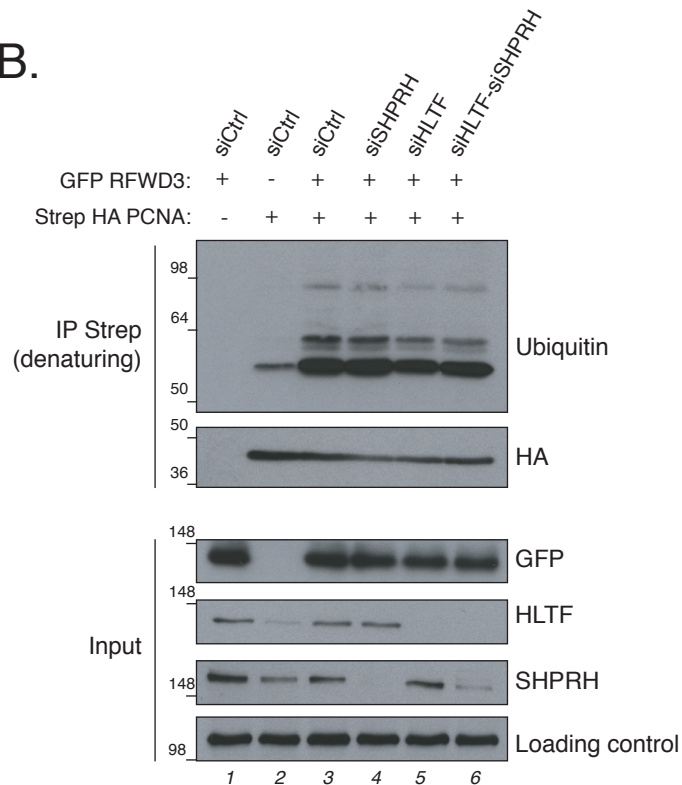

# Figure S6

A.

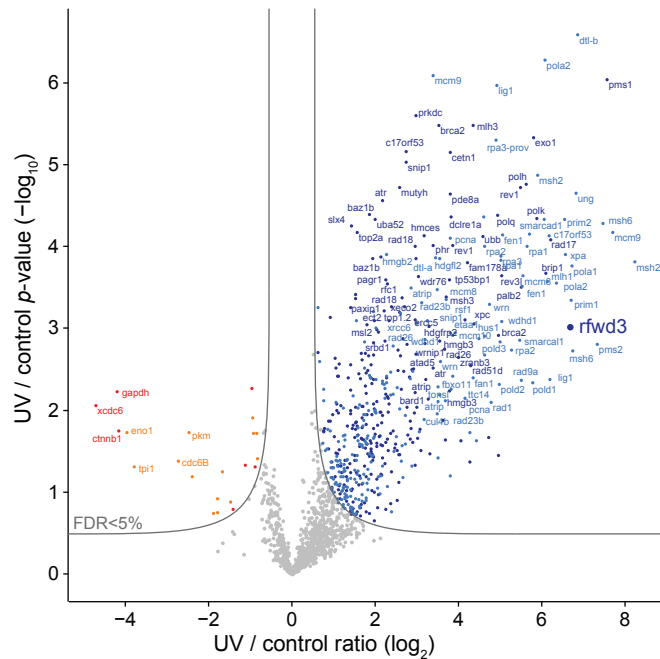

B.

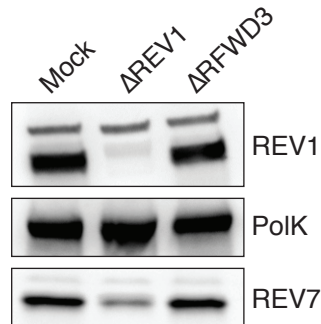

C.

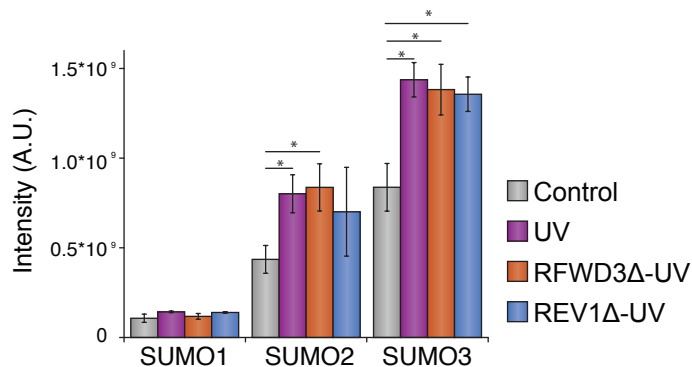

Figure S7

A.

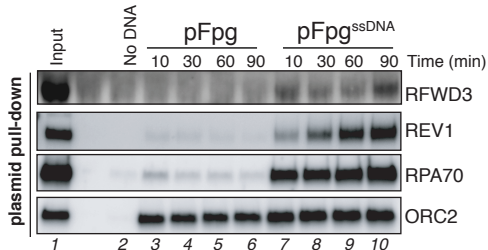

B.

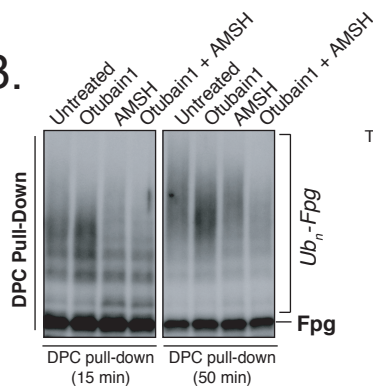

C.

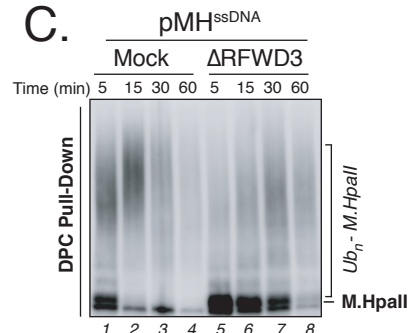

D.

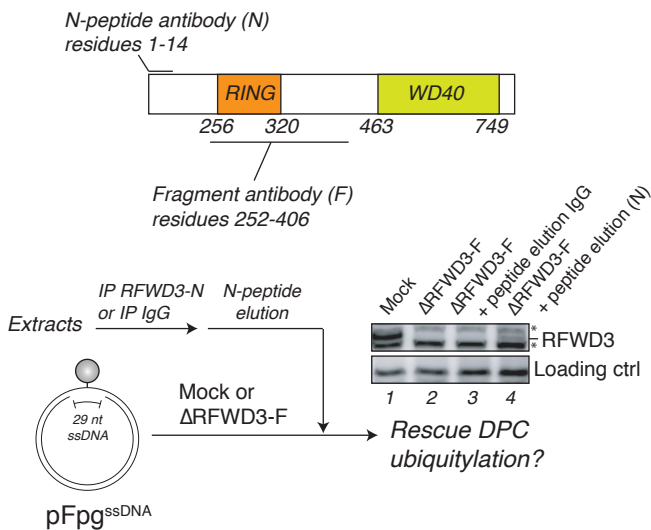

E.

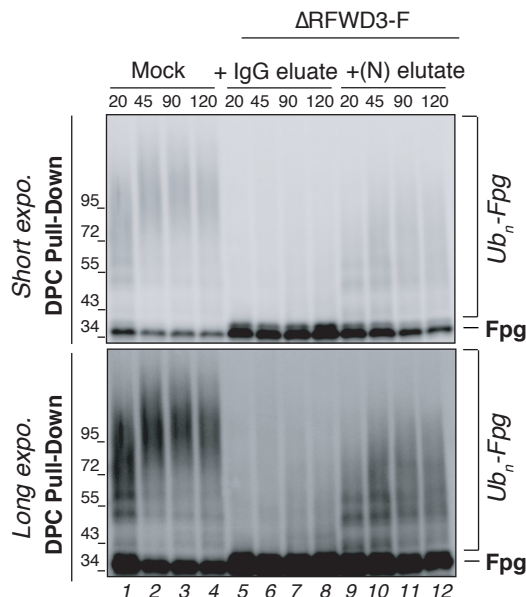

Supplement: mmc1.pdf [file mmc1.pdf]
